# Supplementary material for: Application of chimerical ALT perforator flap with vastus lateralis muscle mass for the reconstruction of oral and submandibular defects after radical resection of tongue carcinoma: a retrospective cohort study
Source: Springer Nature journal article supplement (doi:10.1186/s12903-020-01066-x), 2020-03-30
Supplement: MOESM1 [file 17844792]

# Lower Extremity Functional Scale (LEFS)

---

Source: Binkley JM, Stratford PW, Lott SA, Riddle DL. The Lower Extremity Functional Scale (LEFS): scale development, measurement properties, and clinical application. North American Orthopaedic Rehabilitation Research Network. *Phys Ther.* 1999 Apr;79(4):371-83.

The Lower Extremity Functional Scale (LEFS) is a questionnaire containing 20 questions about a person's ability to perform everyday tasks. The LEFS can be used by clinicians as a measure of patients' initial function, ongoing progress and outcome, as well as to set functional goals.

The LEFS can be used to evaluate the functional impairment of a patient with a disorder of one or both lower extremities. It can be used to monitor the patient over time and to evaluate the effectiveness of an intervention.

## Scoring instructions

The columns on the scale are summed to get a total score. The maximum score is 80.

## Interpretation of scores

- The lower the score the greater the disability.
- The minimal detectable change is 9 scale points.
- The minimal clinically important difference is 9 scale points.
- % of maximal function =  $(\text{LEFS score}) / 80 * 100$

Performance:

- The potential error at a given point in time was +/- 5.3 scale points.
- Test-retest reliability was 0.94.
- Construct reliability was determined by comparison with the SF-36. The scale was found to be reliable with a sensitivity to change superior to the SF-36.

## Instructions

We are interested in knowing whether you are having any difficulty at all with the activities listed below **because of your lower limb problem** for which you are currently seeking attention. Please provide an answer for **each** activity.

**Today, do you or would you have any difficulty at all with:**

| Activities                                                    | Extreme difficulty or unable to perform activity | Quite a bit of difficulty | Moderate difficulty | A little bit of difficulty | No difficulty |
|---------------------------------------------------------------|--------------------------------------------------|---------------------------|---------------------|----------------------------|---------------|
| 1. Any of your usual work, housework or school activities.    | 0                                                | 1                         | 2                   | 3                          | 4             |
| 2. Your usual hobbies, recreational or sporting activities.   | 0                                                | 1                         | 2                   | 3                          | 4             |
| 3. Getting into or out of the bath.                           | 0                                                | 1                         | 2                   | 3                          | 4             |
| 4. Walking between rooms.                                     | 0                                                | 1                         | 2                   | 3                          | 4             |
| 5. Putting on your shoes or socks.                            | 0                                                | 1                         | 2                   | 3                          | 4             |
| 6. Squatting.                                                 | 0                                                | 1                         | 2                   | 3                          | 4             |
| 7. Lifting an object, like a bag of groceries from the floor. | 0                                                | 1                         | 2                   | 3                          | 4             |
| 8. Performing light activities around your home.              | 0                                                | 1                         | 2                   | 3                          | 4             |
| 9. Performing heavy activities around your home.              | 0                                                | 1                         | 2                   | 3                          | 4             |
| 10. Getting into or out of a car.                             | 0                                                | 1                         | 2                   | 3                          | 4             |
| 11. Walking 2 blocks.                                         | 0                                                | 1                         | 2                   | 3                          | 4             |
| 12. Walking a mile.                                           | 0                                                | 1                         | 2                   | 3                          | 4             |
| 13. Going up or down 10 stairs (about 1 flight of stairs).    | 0                                                | 1                         | 2                   | 3                          | 4             |
| 14. Standing for 1 hour.                                      | 0                                                | 1                         | 2                   | 3                          | 4             |
| 15. Sitting for 1 hour.                                       | 0                                                | 1                         | 2                   | 3                          | 4             |
| 16. Running on even ground.                                   | 0                                                | 1                         | 2                   | 3                          | 4             |
| 17. Running on uneven ground.                                 | 0                                                | 1                         | 2                   | 3                          | 4             |
| 18. Making sharp turns while running fast.                    | 0                                                | 1                         | 2                   | 3                          | 4             |
| 19. Hopping.                                                  | 0                                                | 1                         | 2                   | 3                          | 4             |
| 20. Rolling over in bed.                                      | 0                                                | 1                         | 2                   | 3                          | 4             |
| <b>Column Totals:</b>                                         | 0                                                | 1                         | 2                   | 3                          | 4             |
